# Supplementary material
Source: Springer Nature journal article supplement (https://www.springermedizin.de/resource/supplementary/12943_2008_378_MOESM3_ESM.pdf/9554054)

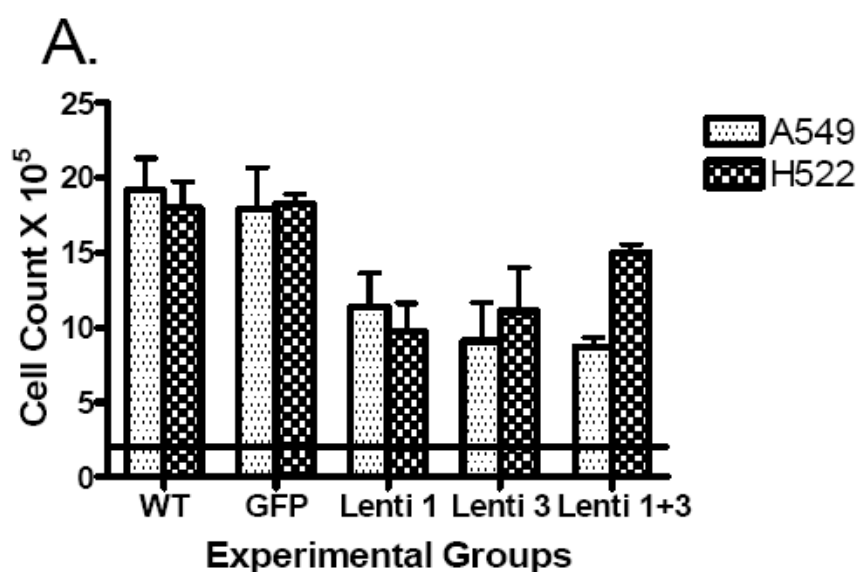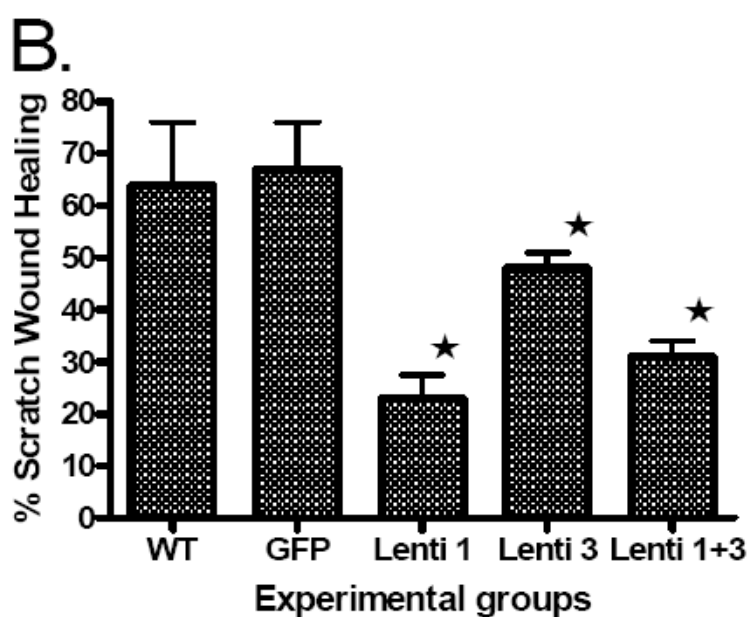

★ ( $P < 0.005$ )

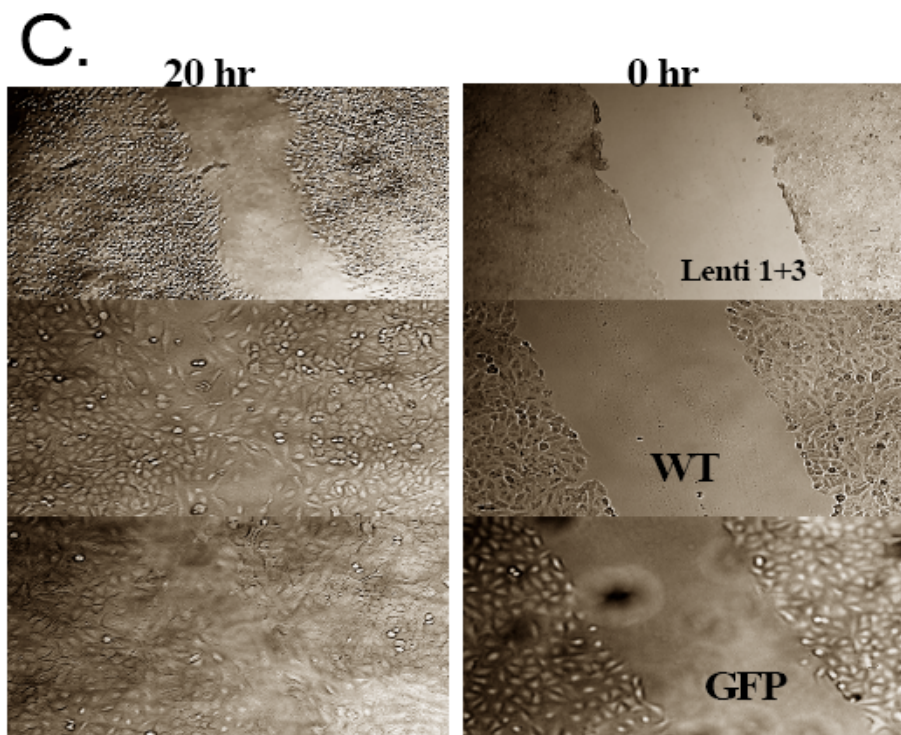

Supplement: MOESM3 [file 9554054]
